# Supplementary material for: Integrated Cycles for Urban Biomass as a Strategy to Promote a CO2-Neutral Society—A Feasibility Study
Source: MDPI journal article supplement (doi:10.3390/su13179505), 2021-08-24
Supplement: s1 [file s1]

### Calculation of soiling® efficiency

Before soiling®:

NH<sub>3</sub> → 200 mg/l

After soiling®:

NH<sub>3</sub> → 15 mg/l

$$100\% - \frac{100\%}{200 \frac{mg}{l}} * 15 \frac{mg}{l} = 92.5 \%$$
