# Supplementary material for: Integrated Cycles for Urban Biomass as a Strategy to Promote a CO2-Neutral Society—A Feasibility Study
Source: MDPI journal article supplement (doi:10.3390/su13179505), 2021-08-24
Supplement: s1 [file s1]

## Parameter for ICU-models in Simba#Biogas

1. <block name="main fermenter" blockType="sisiBlock" x="625" y="230" w="125" h="95" drawFrame="False" help="simba#\_biogas\_reactor\_vffg\_h.pdf">
2.     <extra blockID="badmLib.adm\_vffg\_h" Hlpldx="">
3.     <Module id="main fermenter" subtype="adm1da|gash|adm1da2gash|adm1da2meas|{Default State}" Assambly="badmLib.dll" Class="badmLib.adm\_vffg\_h">
4.         <parameters>
5.             <par id="SeparatorMA" val="Model approach" />
6.             <par id="SludgeModel" val="adm1da" />
7.             <par id="ConverterModel" val="adm1da2gash" />
8.             <par id="ConverterMeasModel" val="adm1da2meas" />
9.             <par id="HasBioProcesses" val="true" />
10.            <par id="HasExtBioPar" val="false" />
11.            <par id="HasSludgeOutput" val="true" />
12.            <par id="HasSludgeRatesOutput" val="false" />
13.            <par id="NumberOfGasPorts" val="1" />
14.            <par id="SeparatorRP" val="Reactor parameters" />
15.            <par id="MaxTankVolume" val="1100\*5" />
16.            <par id="MaxSludgeVolume" val="1000\*5" />
17.            <par id="InitSludgeVolume" val="1000\*5" />
18.            <par id="MaxSludgeHeigth" val="8" />
19.            <par id="ExternTemperature" val="false" />
20.            <par id="Temperature" val="55" />
21.            <par id="AutomaticV2COD" val="true" />
22.            <par id="Volume2COD" val="0.0006" />
23.            <par id="adm1da2gashkLa\_CO2" val="200.0" />
24.            <par id="adm1da2gashkLa\_CH4" val="200.0" />
25.            <par id="adm1da2gashkLa\_H2" val="200.0" />
26.            <par id="adm1da2gashkLa\_NH3" val="200.0" />
27.            <par id="StateFile" val="{Default State}" />
28.            <par id="StateBlock" val="" />
29.         </parameters>
30.         <Input id="SludgeControl" vis="True" Link="Rezi" LinkIdx="0" />
31.         <Input id="SludgeInflow" vis="True" Link="1st fermenter" LinkIdx="0" />
32.         <Input id="GasFlow0" vis="True" Link="Pipe" LinkIdx="0" />
33.         </Module>
34.     </extra>
35.     <icon rotate="False" flip="True" />
36. </block>
37. <block name="FM2M1" blockType="sisiBlock" x="185" y="195" w="25" h="25">
38.     <extra blockID="basmlib.asm\_convBlock" Hlpldx="">
39.     <Module id="FM2M1" subtype="fm2substratem1\_v2" Assambly="basmlib.dll" Class="basmlib.asm\_convBlock">
40.         <parameters>
41.             <par id="TS" val="330" />
42.             <par id="NH4" val="0.7" />
43.         </parameters>

```

44.      <Input id="u1" vis="True" Link="From Excel" LinkIdx="0" />
45.      </Module>
46.    </extra>
47.    <icon rotate="False" flip="True" />
48.  </block>
49.  <block name="Pipe" blockType="sisiBlock" x="760" y="180" w="35" h="10"
    bgCol="#64CCFF34" help="simba#_air_pipe.pdf">
50.    <extra blockID="airlibBlocks.Air_SimpPipeBi" HlIdx="">
51.      <Module id="Pipe" subtype="gash" Assambly="airlibBlocks.dll"
        Class="airlibBlocks.Air_SimpPipeBi">
52.        <parameters>
53.          <par id="Model" val="gash" />
54.          <par id="zeta_e" val="2" />
55.          <par id="k" val="0.02" />
56.          <par id="l" val="10" />
57.          <par id="d" val="0.075" />
58.          <par id="oneWay" val="false" />
59.          <par id="simple" val="true" />
60.          <par id="designVs" val="3.3337947101344607" />
61.          <par id="nbarrel" val="1" />
62.          <par id="animate" val="true" />
63.        </parameters>
64.        <Output id="y" vis="False" Link="" />
65.      </Module>
66.    </extra>
67.    <defShape typ="Rectangle" lWidth="2" fcol="#FF0020B8" />
68.    <icon rotate="False" flip="True" />
69.  </block>
70.  <block name="setEnvTemp" blockType="sisiBlock" x="200" y="15" w="50" h="20"
    help="simba#_air_setEnvTemperatureGain.pdf">
71.    <extra blockID="airlibBlocks.Air_setEnvTemperatureGain" HlIdx="">
72.      <Module id="setEnvTemp" subtype="" Assambly="airlibBlocks.dll"
        Class="airlibBlocks.Air_setEnvTemperatureGain">
73.        <parameters>
74.          <par id="dP_min_pipe" val="100" />
75.          <par id="Zeta_min" val="1" />
76.        </parameters>
77.        <Input id="u" vis="True" Link="temperature air" LinkIdx="0" />
78.        <Output id="y" vis="False" Link="temperature_air" />
79.      </Module>
80.    </extra>
81.    <defShape typ="Arrow" fcol="#FF9B8500" bgcol="#3BEFCD00" var1="0.2"
    shadow="True" />
82.    <icon rotate="False" flip="True" />
83.  </block>
84.  <block name="temperature air" blockType="sisiBlock" x="95" y="15" w="50" h="20"
    bgCol="#FF5BA1C4">
85.    <extra blockID="basmlib.asm_convBlock" HlIdx="">

```

```

86.      <Module id="temperature air" subtype="setairtemperature"
      Assambly="basmlib.dll" Class="basmlib.asm_convBlock">
87.          <parameters>
88.              <par id="theta" val="20" />
89.          </parameters>
90.      </Module>
91.  </extra>
92.  <defShape typ="Rectangle" fcol="#FF9B8500" bgcol="#3BEFCD00" shadow="True" />
93.  <icon rotate="False" flip="True" name=" " x="0" y="0" w="1" h="1" scale="True" />
94. </block>
95.  <block name="1st fermenter" blockType="sisiBlock" x="435" y="230" w="60" h="55"
      drawFrame="False" help="simba#_biogas_reactor_vfvg_h_en.pdf">
96.      <extra blockID="badmLib.adm_vfvg_h" Hlpldx="">
97.          <Module id="1st fermenter" subtype="" Assambly="badmLib.dll"
      Class="badmLib.adm_vfvg_h">
98.              <parameters>
99.                  <par id="SeparatorMA" val="Model approach" />
100.                  <par id="SludgeModel" val="adm1da" />
101.                  <par id="ConverterModel" val="adm1da2gash" />
102.                  <par id="ConverterMeasModel" val="adm1da2meas" />
103.                  <par id="HasBioProcesses" val="true" />
104.                  <par id="HasExtBioPar" val="false" />
105.                  <par id="HasSludgeOutput" val="false" />
106.                  <par id="HasSludgeRatesOutput" val="false" />
107.                  <par id="NumberOfGasPorts" val="1" />
108.                  <par id="SeparatorRP" val="Reactor parameters" />
109.                  <par id="MaxTankVolume" val="110" />
110.                  <par id="MaxSludgeVolume" val="100" />
111.                  <par id="InitSludgeVolume" val="100" />
112.                  <par id="MaxSludgeHeigth" val="8" />
113.                  <par id="ExcessPressure" val="2" />
114.                  <par id="ExternTemperature" val="false" />
115.                  <par id="Temperature" val="20" />
116.                  <par id="AutomaticV2COD" val="true" />
117.                  <par id="Volume2COD" val="0.0006" />
118.                  <par id="adm1da2gashkLa_CO2" val="200.0" />
119.                  <par id="adm1da2gashkLa_CH4" val="200.0" />
120.                  <par id="adm1da2gashkLa_H2" val="200.0" />
121.                  <par id="adm1da2gashkLa_NH3" val="200.0" />
122.                  <par id="StateFile" val="{Default State}" />
123.                  <par id="StateBlock" val="" />
124.              </parameters>
125.              <Input id="SludgeInflow" vis="True" Link="Mix" LinkIdx="0" />
126.              <Input id="GasFlow0" vis="True" Link="Pipe1" LinkIdx="0" />
127.          </Module>
128.      </extra>
129.      <icon rotate="False" flip="True" />
130. </block>

```



```

170.         <par id="n_H2S" val="0" />
171.         <par id="RH" val="70" />
172.         <par id="calcP" val="false" />
173.         <par id="h0" val="0" />
174.         <par id="hw" val="4" />
175.         <par id="extP" val="false" />
176.         <par id="P" val="1013.25+5" />
177.         <par id="Pmin" val="1000" />
178.         <par id="Pmax" val="1500" />
179.         <par id="isSource" val="false" />
180.         <par id="animate" val="false" />
181.         <par id="T1" val="2.0/(24.0*60.0)" />
182.     </parameters>
183.     <Input id="Tair" vis="False" Link="temperature_air" />
184.     <Input id="i" vis="True" Link="Pipe" LinkIdx="1" />
185. </Module>
186. </extra>
187. <defShape typ="Rectangle" lWidth="2" fcol="#FF0020B8" var1="0.5" />
188. <icon rotate="False" flip="True" />
189. </block>
190. <block name="Mix" blockType="sisiBlock" x="320" y="210" w="45" h="95"
drawFrame="False" help="SIMBA#_Global_Block_Mix.pdf" page="28">
191.     <extra blockID="basmlib.asm_mixBlock" HlIdx="">
192.         <Module id="Mix" subtype="adm1da" Assambly="basmlib.dll"
Class="basmlib.asm_mixBlock">
193.             <parameters>
194.                 <par id="Model" val="adm1da" />
195.                 <par id="type" val="classic" />
196.                 <par id="nin" val="3" />
197.             </parameters>
198.             <Input id="u0" vis="True" Link="Silages" LinkIdx="0" />
199.             <Input id="u1" vis="True" Link="Silages1" LinkIdx="0" />
200.             <Input id="u2" vis="True" Link="Separator RF " LinkIdx="0" />
201.         </Module>
202.     </extra>
203.     <icon rotate="False" flip="True" />
204. </block>
205. <block name="Silages1" blockType="sisiBlock" x="240" y="260" w="25" h="25"
help="simba#_biogas_inflow_silages_v2_en.pdf">
206.     <extra blockID="basmlib.asm_convBlock" HlIdx="">
207.         <Module id="Silages1" subtype="tg_adm1da_v_silages_v2"
Assambly="basmlib.dll" Class="basmlib.asm_convBlock" resObjSetName="Grass silage -
blooming">
208.             <parameters>
209.                 <par id="COD_deg_type" val="Indicate biogas potential" />
210.                 <par id="V_m" val="0.022413" />
211.                 <par id="CH4_cod_2_mol" val="64" />
212.                 <par id="BGP" val="560" />
213.                 <par id="BMP" val="302.5" />

```

```

214.      <par id="aXI" val="0.2869" />
215.      <par id="fOTSrf" val="0.9" />
216.      <par id="fsOTS" val="0" />
217.      <par id="ffOTS" val="1" />
218.      <par id="aSi" val="0" />
219.      <par id="fRF" val="0.295" />
220.      <par id="fRP" val="0.07" />
221.      <par id="fRFe" val="0.08" />
222.      <par id="fRA" val="0.105" />
223.      <par id="Temp" val="20" />
224.      <par id="ph" val="4" />
225.      <par id="KS43" val="0" />
226.      <par id="FFS" val="5" />
227.      <par id="roh_CH" val="s_fp('adm1da','roh_CH')" />
228.      <par id="roh_PR" val="s_fp('adm1da','roh_PR')" />
229.      <par id="roh_LI" val="s_fp('adm1da','roh_LI')" />
230.      <par id="roh_MI" val="s_fp('adm1da','roh_MI')" />
231.      <par id="roh_AC" val="s_fp('adm1da','roh_AC')" />
232.      <par id="roh_H2O" val="1000" />
233.      <par id="MP_CH" val="s_fp('adm1da','MP_CH')" />
234.      <par id="MP_PR" val="s_fp('adm1da','MP_PR')" />
235.      <par id="MP_LI" val="s_fp('adm1da','MP_LI')" />
236.      <par id="MP_AC" val="s_fp('adm1da','MP_AC')" />
237.      <par id="Kw_35" val="s_fp('adm1da','Kw_35')" />
238.      <par id="M_Sva" val="s_fp('adm1da','M_Sva')" />
239.      <par id="M_Sbu" val="s_fp('adm1da','M_Sbu')" />
240.      <par id="M_Spro" val="s_fp('adm1da','M_Spro')" />
241.      <par id="M_Sac" val="s_fp('adm1da','M_Sac')" />
242.      <par id="M_Sh2" val="s_fp('adm1da','M_Sh2')" />
243.      <par id="M_XB" val="s_fp('adm1da','M_XB')" />
244.      <par id="M_Xch" val="s_fp('adm1da','M_Xch')" />
245.      <par id="M_Xpr" val="s_fp('adm1da','M_Xpr')" />
246.      <par id="M_Xli" val="s_fp('adm1da','M_Xli')" />
247.      <par id="Kava" val="s_fp('adm1da','Kava')" />
248.      <par id="Kabu" val="s_fp('adm1da','Kabu')" />
249.      <par id="Kapro" val="s_fp('adm1da','Kapro')" />
250.      <par id="Kaac" val="s_fp('adm1da','Kaac')" />
251.      <par id="Kaco2_35" val="s_fp('adm1da','Kaco2_35')" />
252.      <par id="Kain_35" val="s_fp('adm1da','Kain_35')" />
253.      <par id="N_aa" val="s_fp('adm1da','N_aa')" />
254.      </parameters>
255.      <Input id="u1" vis="True" Link="FM2M2" LinkIdx="0" />
256.    </Module>
257.  </extra>
258.  <icon rotate="False" flip="True" />
259. </block>
260. <block name="FM2M2" blockType="sisiBlock" x="185" y="260" w="25"
    h="25">
261.    <extra blockID="basmlib.asm_convBlock" HlpIdx="">

```

```

262.         <Module id="FM2M2" subtype="fm2substratem1_v2"
           Assembly="basmlib.dll" Class="basmlib.asm_convBlock">
263.             <parameters>
264.                 <par id="TS" val="330" />
265.                 <par id="NH4" val="0.7" />
266.             </parameters>
267.             <Input id="u1" vis="True" Link="Switch" LinkIdx="0" />
268.         </Module>
269.     </extra>
270.     <icon rotate="False" flip="True" />
271. </block>
272. <block name="plant" blockType="sisiBlock" x="20" y="325" w="30" h="30"
  bgCol="#F2EFEFEF" help="SIMBA#_Global_Block_Temperature_Zero.pdf" page="32">
273.     <extra blockID="basmlib.asm_constBlock" Hlpldx="">
274.         <Module id="plant" subtype="Signal,1" Assambly="basmlib.dll"
           Class="basmlib.asm_constBlock">
275.             <parameters>
276.                 <par id="Model" val="Signal" />
277.                 <par id="Dimmension" val="1" />
278.                 <par id="Constant_0" val="0.2" />
279.                 <par id="unit_0" val="-" />
280.                 <par id="sel_0" val="User defined" />
281.                 <par id="displayUnits" val="false" />
282.             </parameters>
283.         </Module>
284.     </extra>
285.     <defShape typ="Rectangle" fcol="#FF606060" bgcol="#26606060"
  shadow="True" />
286.     <icon rotate="False" flip="True" />
287. </block>
288. <block name="Switch" blockType="sisiBlock" x="135" y="290" w="15" h="65"
  drawFrame="False" fgCol="#FFB7B7B7" help="simba#_manual_referenz.xps" page="58">
289.     <extra blockID="signalLib.switchBlock" Hlpldx="">
290.         <Module id="Switch" subtype="2" Assambly="signalLib.dll"
           Class="signalLib.switchBlock">
291.             <parameters>
292.                 <par id="inputIdx" val="Input 2" />
293.                 <par id="switchByInput" val="false" />
294.                 <par id="numberOfInputs" val="2" />
295.                 <par id="n" val="1" />
296.             </parameters>
297.             <Input id="u0" vis="True" Link="plant" LinkIdx="0" />
298.             <Input id="u1" vis="True" Link="plant1" LinkIdx="0" />
299.         </Module>
300.     </extra>
301.     <icon rotate="False" flip="True" />
302. </block>
303. <block name="Gasproduktion" blockType="sisiBlock" x="1285" y="200" w="55"
  h="15" help="SIMBA#_Global_Block_Sink.pdf" page="30">

```

```

304.         <extra blockID="basmlib.asm_sinkBlock" Hlpldx="">
305.             <Anno>DQo=</Anno>
306.             <Module id="Gasproduktion" subtype="gash" Assambly="basmlib.dll"
Class="basmlib.asm_sinkBlock">
307.                 <parameters>
308.                     <par id="Model" val="gash" />
309.                     <par id="size" val="12" />
310.                     <par id="sinktype" val="Other" />
311.                     <par id="display" val="false" />
312.                     <par id="feedThrough" val="false" />
313.                 </parameters>
314.                 <Input id="u" vis="True" Link="meas1" LinkIdx="0" />
315.             </Module>
316.         </extra>
317.         <defShape typ="Arrow" lWidth="1.5" fcol="#FF0049C3" bgcol="#180049C3"
var1="0.2" shadow="True" />
318.         <icon rotate="True" flip="False" />
319.     </block>
320.     <block name="Gasanalyse" blockType="sisiBlock" x="1065" y="90" w="65"
h="100" help="simba#_manual_refad_en.xps" page="10">
321.         <extra blockID="basmlib.asm_convBlock" Hlpldx="">
322.             <Module id="Gasanalyse" subtype="gasanalyseV2a_gash"
Assambly="basmlib.dll" Class="basmlib.asm_convBlock">
323.                 <Input id="Gas_in" vis="True" Link="Mix1" LinkIdx="0" />
324.             </Module>
325.         </extra>
326.         <icon rotate="False" flip="True" />
327.     </block>
328.     <block name="CH4" blockType="sisiBlock" x="1240" y="100" w="20" h="10"
help="SIMBA#_Global_Block_Sink.pdf" page="30">
329.         <extra blockID="basmlib.asm_sinkBlock" Hlpldx="">
330.             <Anno>DQo=</Anno>
331.             <Module id="CH4" subtype="Signal,1" Assambly="basmlib.dll"
Class="basmlib.asm_sinkBlock">
332.                 <parameters>
333.                     <par id="Model" val="Signal" />
334.                     <par id="size" val="1" />
335.                     <par id="sinktype" val="Effluent" />
336.                     <par id="display" val="false" />
337.                     <par id="feedThrough" val="false" />
338.                     <par id="unit_0" val="." />
339.                 </parameters>
340.                 <Input id="u" vis="True" Link="Gasanalyse" LinkIdx="0" />
341.             </Module>
342.         </extra>
343.         <defShape typ="Arrow" lWidth="1.5" fcol="#FF0049C3" bgcol="#180049C3"
var1="0.2" shadow="True" />
344.         <icon rotate="True" flip="False" />
345.     </block>

```



```

346.         <block name="O2" blockType="sisiBlock" x="1240" y="120" w="20" h="10"
             help="SIMBA#_Global_Block_Sink.pdf" page="30">
347.         <extra blockID="basmlib.asm_sinkBlock" Hlpldx="">
348.         <Anno>DQo=</Anno>
349.         <Module id="O2" subtype="Signal,1" Assambly="basmlib.dll"
             Class="basmlib.asm_sinkBlock">
350.         <parameters>
351.         <par id="Model" val="Signal" />
352.         <par id="size" val="1" />
353.         <par id="sinktype" val="Effluent" />
354.         <par id="display" val="false" />
355.         <par id="feedThrough" val="false" />
356.         <par id="unit_0" val="-" />
357.         </parameters>
358.         <Input id="u" vis="True" Link="Gasanalyse" LinkIdx="2" />
359.         </Module>
360.         </extra>
361.         <defShape typ="Arrow" lWidth="1.5" fcol="#FF0049C3" bgcol="#180049C3"
             var1="0.2" shadow="True" />
362.         <icon rotate="True" flip="False" />
363.         </block>
364.         <block name="H2S2" blockType="sisiBlock" x="1240" y="140" w="20" h="10"
             help="SIMBA#_Global_Block_Sink.pdf" page="30">
365.         <extra blockID="basmlib.asm_sinkBlock" Hlpldx="">
366.         <Anno>DQo=</Anno>
367.         <Module id="H2S2" subtype="Signal,1" Assambly="basmlib.dll"
             Class="basmlib.asm_sinkBlock">
368.         <parameters>
369.         <par id="Model" val="Signal" />
370.         <par id="size" val="1" />
371.         <par id="sinktype" val="Effluent" />
372.         <par id="display" val="false" />
373.         <par id="feedThrough" val="false" />
374.         <par id="unit_0" val="-" />
375.         </parameters>
376.         <Input id="u" vis="True" Link="Gasanalyse" LinkIdx="4" />
377.         </Module>
378.         </extra>
379.         <defShape typ="Arrow" lWidth="1.5" fcol="#FF0049C3" bgcol="#180049C3"
             var1="0.2" shadow="True" />
380.         <icon rotate="True" flip="False" />
381.         </block>
382.         <block name="H2" blockType="sisiBlock" x="1195" y="130" w="20" h="10"
             help="SIMBA#_Global_Block_Sink.pdf" page="30">
383.         <extra blockID="basmlib.asm_sinkBlock" Hlpldx="">
384.         <Anno>DQo=</Anno>
385.         <Module id="H2" subtype="Signal,1" Assambly="basmlib.dll"
             Class="basmlib.asm_sinkBlock">
386.         <parameters>

```

```

387.         <par id="Model" val="Signal" />
388.         <par id="size" val="1" />
389.         <par id="sinktype" val="Effluent" />
390.         <par id="display" val="false" />
391.         <par id="feedThrough" val="false" />
392.         <par id="unit_0" val="-" />
393.     </parameters>
394.     <Input id="u" vis="True" Link="Gasanalyse" LinkIdx="3" />
395. </Module>
396. </extra>
397. <defShape typ="Arrow" lWidth="1.5" fcol="#FF0049C3" bgcol="#180049C3"
    var1="0.2" shadow="True" />
398.     <icon rotate="True" flip="False" />
399. </block>
400. <block name="CH4_tr" blockType="sisiBlock" x="1240" y="170" w="20" h="10"
    help="SIMBA#_Global_Block_Sink.pdf" page="30">
401.     <extra blockID="basmlib.asm_sinkBlock" HlIdx="">
402.         <Anno>DQo=</Anno>
403.         <Module id="CH4_tr" subtype="Signal,1" Assambly="basmlib.dll"
            Class="basmlib.asm_sinkBlock">
404.             <parameters>
405.                 <par id="Model" val="Signal" />
406.                 <par id="size" val="1" />
407.                 <par id="sinktype" val="Effluent" />
408.                 <par id="display" val="false" />
409.                 <par id="feedThrough" val="false" />
410.                 <par id="unit_0" val="-" />
411.             </parameters>
412.             <Input id="u" vis="True" Link="Gasanalyse" LinkIdx="7" />
413.         </Module>
414.     </extra>
415.     <defShape typ="Arrow" lWidth="1.5" fcol="#FF0049C3" bgcol="#180049C3"
        var1="0.2" shadow="True" />
416.         <icon rotate="True" flip="False" />
417.     </block>
418. <block name="CO2" blockType="sisiBlock" x="1195" y="110" w="20" h="10"
    help="SIMBA#_Global_Block_Sink.pdf" page="30">
419.     <extra blockID="basmlib.asm_sinkBlock" HlIdx="">
420.         <Anno>DQo=</Anno>
421.         <Module id="CO2" subtype="Signal,1" Assambly="basmlib.dll"
            Class="basmlib.asm_sinkBlock">
422.             <parameters>
423.                 <par id="Model" val="Signal" />
424.                 <par id="size" val="1" />
425.                 <par id="sinktype" val="Effluent" />
426.                 <par id="display" val="false" />
427.                 <par id="feedThrough" val="false" />
428.                 <par id="unit_0" val="-" />
429.             </parameters>

```

```

430.         <Input id="u" vis="True" Link="Gasanalyse" LinkIdx="1" />
431.     </Module>
432. </extra>
433.     <defShape typ="Arrow" lWidth="1.5" fcol="#FF0049C3" bgcol="#180049C3"
var1="0.2" shadow="True" />
434.     <icon rotate="True" flip="False" />
435. </block>
436. <block name="Qch4" blockType="sisiBlock" x="1380" y="245" w="20" h="40"
help="simba#_manual_referenz.xps" page="48">
437.     <extra blockID="signalLib.MULn" HlIdx="">
438.         <Module id="Qch4" subtype="" Assambly="signalLib.dll"
Class="signalLib.MULn">
439.             <parameters>
440.                 <par id="n" val="1" />
441.                 <par id="Input signs" val="**/" />
442.             </parameters>
443.             <Input id="u0" vis="True" Link="Gasanalyse" LinkIdx="0" />
444.             <Input id="u1" vis="True" Link="meas1" LinkIdx="1" />
445.             <Input id="u2" vis="True" Link="const1" LinkIdx="0" />
446.         </Module>
447.     </extra>
448.     <defShape typ="Rectangle" fcol="#FF606060" bgcol="#26606060"
shadow="True" />
449.     <icon rotate="False" flip="False" />
450. </block>
451. <block name="meas1" blockType="sisiBlock" x="1240" y="225" w="25" h="55"
drawFrame="False" drawName="False" bgCol="#D3F0F3F5"
help="SIMBA#_Global_Block_Meas.pdf" page="33">
452.     <extra blockID="basmlib.asm_measBlock" HlIdx="">
453.         <Anno>DQo=</Anno>
454.         <Module id="meas1" subtype="gash" Assambly="basmlib.dll"
Class="basmlib.asm_measBlock">
455.             <parameters>
456.                 <par id="Model" val="gash" />
457.                 <par id="horz" val="false" />
458.                 <par id="label" val="false" />
459.                 <par id="n_N2" val="false" />
460.                 <par id="n_O2" val="false" />
461.                 <par id="n_CO2" val="false" />
462.                 <par id="n_CH4" val="false" />
463.                 <par id="n_H2" val="false" />
464.                 <par id="n_NH3" val="false" />
465.                 <par id="n_N2O" val="false" />
466.                 <par id="n_SO2" val="false" />
467.                 <par id="n_H2S" val="false" />
468.                 <par id="n_H2O" val="false" />
469.                 <par id="theta" val="false" />
470.                 <par id="Q" val="true" />
471.                 <par id="P: R" val="false" />

```

```

472.         <par id="P: Roh" val="false" />
473.         <par id="P: COD" val="false" />
474.         <par id="P: N" val="false" />
475.         <par id="P: P" val="false" />
476.         <par id="P: C" val="false" />
477.         <par id="P: S" val="false" />
478.         <par id="P: M" val="false" />
479.         <par id="P: a" val="false" />
480.         <par id="P: b" val="false" />
481.         <par id="P: c" val="false" />
482.         <par id="P: d" val="false" />
483.         <par id="isDyn" val="false" />
484.         <par id="T" val="1/(24*60*60)" />
485.     </parameters>
486.     <Input id="u" vis="True" Link="Gasanalyse" LinkIdx="5" />
487. </Module>
488. </extra>
489. <icon rotate="False" flip="True" />
490. </block>
491. <block name="n" blockType="aBranchBlock" x="1220" y="100" w="10" h="10"
    drawFrame="False" drawName="False">
492.     <extra btype="1" lineType="Signal" lineExtra="1" />
493.     <icon rotate="False" flip="False" />
494. </block>
495. <block name="const1" blockType="sisiBlock" x="1310" y="285" w="35" h="20"
    drawName="False" bgCol="#F2EFEFEF"
    help="SIMBA#_Global_Block_Temperature_Zero.pdf" page="32">
496.     <extra blockID="basmlib.asm_constBlock" HlIdx="">
497.     <Module id="const1" subtype="Signal,1" Assambly="basmlib.dll"
        Class="basmlib.asm_constBlock">
498.         <parameters>
499.             <par id="Model" val="Signal" />
500.             <par id="Dimmension" val="1" />
501.             <par id="Constant_0" val="100" />
502.             <par id="unit_0" val="-" />
503.             <par id="sel_0" val="User defined" />
504.             <par id="displayUnits" val="false" />
505.         </parameters>
506.     </Module>
507. </extra>
508. <defShape typ="Rectangle" fcol="#FF606060" bgcol="#26606060"
    shadow="True" />
509.     <icon rotate="False" flip="True" />
510. </block>
511. <block name="Annotation3" blockType="aBlockAnnotation" x="1265" y="335"
    w="250" h="50" drawName="False" help="simba#_wwtp_block_annotation.pdf"
    page="35">
512.     <extra anno="&lt;b&gt;Annotation&lt;/b&gt;&#xD;&#xA;&lt;br&gt;
        &#xD;&#xA;&lt;br&gt;

```

```

&#xD;&#xA;&lt;br/&gt;&#xD;&#xA;Gasanalyse&#xD;&#xA;&lt;br/&gt;&#xD;&#xA;Calculat
ion of gas amounts (CH4, CO2, H2, O2)&#xD;&#xA;&#xD;&#xA;" imScale="1" mleft="8" />
513.      <defShape typ="Rectangle" fcol="#76000000" bgcol="#12000000"
shadow="True" />
514.      <icon rotate="True" flip="False" />
515.      </block>
516.      <block name="Biogas into kWh1" blockType="sisiBlock" x="1445" y="250"
w="35" h="30" help="simba#_manual_referenz.xps" page="47">
517.      <extra blockID="signalLib.Gain" HlpIdx="">
518.      <Module id="Biogas into kWh1" subtype="" Assambly="signalLib.dll"
Class="signalLib.Gain">
519.      <parameters>
520.      <par id="n" val="1" />
521.      <par id="K" val="10.5" />
522.      <par id="inunit" val="-" />
523.      <par id="outunit" val="-" />
524.      </parameters>
525.      <Input id="u" vis="True" Link="Qch4" LinkIdx="0" />
526.      </Module>
527.      </extra>
528.      <defShape typ="Arrow" fcol="#FF606060" bgcol="#26606060" var1="0.2"
shadow="True" />
529.      <icon rotate="True" flip="False" />
530.      </block>
531.      <block name="kWh1" blockType="sisiBlock" x="1505" y="260" w="50" h="15"
help="SIMBA#_Global_Block_Sink.pdf" page="30">
532.      <extra blockID="basmlib.asm_sinkBlock" HlpIdx="">
533.      <Anno>DQo=</Anno>
534.      <Module id="kWh1" subtype="Signal,1" Assambly="basmlib.dll"
Class="basmlib.asm_sinkBlock">
535.      <parameters>
536.      <par id="Model" val="Signal" />
537.      <par id="size" val="1" />
538.      <par id="sinktype" val="Other" />
539.      <par id="display" val="true" />
540.      <par id="feedThrough" val="false" />
541.      <par id="unit_0" val="-" />
542.      </parameters>
543.      <Input id="u" vis="True" Link="Biogas into kWh1" LinkIdx="0" />
544.      </Module>
545.      </extra>
546.      <defShape typ="Arrow" lWidth="1.5" fcol="#FF0049C3" bgcol="#180049C3"
var1="0.2" shadow="True" />
547.      <icon rotate="True" flip="False" />
548.      </block>
549.      <block name="n1" blockType="aBranchBlock" x="1415" y="260" w="10"
h="10" drawFrame="False" drawName="False">
550.      <extra btype="1" lineType="Signal" lineExtra="1" />
551.      <icon rotate="False" flip="False" />

```

```

552.         </block>
553.         <block name="CH4_volume" blockType="sisiBlock" x="1505" y="315" w="50"
             h="15" help="SIMBA#_Global_Block_Sink.pdf" page="30">
554.             <extra blockID="basmlib.asm_sinkBlock" HlpIdx="">
555.                 <Anno>DQo=</Anno>
556.                 <Module id="CH4_volume" subtype="Signal,1" Assambly="basmlib.dll"
                     Class="basmlib.asm_sinkBlock">
557.                     <parameters>
558.                         <par id="Model" val="Signal" />
559.                         <par id="size" val="1" />
560.                         <par id="sinktype" val="Other" />
561.                         <par id="display" val="true" />
562.                         <par id="feedThrough" val="false" />
563.                         <par id="unit_0" val="-" />
564.                     </parameters>
565.                     <Input id="u" vis="True" Link="Qch4" LinkIdx="0" />
566.                 </Module>
567.             </extra>
568.             <defShape typ="Arrow" lWidth="1.5" fcol="#FF0049C3" bgcol="#180049C3"
                 var1="0.2" shadow="True" />
569.             <icon rotate="True" flip="False" />
570.         </block>
571.         <block name="Silages" blockType="sisiBlock" x="235" y="195" w="25" h="25"
             help="simba#_biogas_inflow_silages_v2_en.pdf">
572.             <extra blockID="basmlib.asm_convBlock" HlpIdx="">
573.                 <Module id="Silages" subtype="tg_adm1da_v_silages_v2"
                     Assambly="basmlib.dll" Class="basmlib.asm_convBlock" resObjSetName="Maize silage -
                     milk ripeness">
574.                     <parameters>
575.                         <par id="COD_deg_type" val="Indicate biogas potential" />
576.                         <par id="V_m" val="0.022413" />
577.                         <par id="CH4_cod_2_mol" val="64" />
578.                         <par id="BGP" val="615" />
579.                         <par id="BMP" val="337.4" />
580.                         <par id="aXI" val="0.2182" />
581.                         <par id="fOTSrf" val="0.95" />
582.                         <par id="fsOTS" val="0" />
583.                         <par id="ffOTS" val="1" />
584.                         <par id="aSi" val="0" />
585.                         <par id="fRF" val="0.235" />
586.                         <par id="fRP" val="0.07" />
587.                         <par id="fRFe" val="0.08" />
588.                         <par id="fRA" val="0.105" />
589.                         <par id="Temp" val="20" />
590.                         <par id="ph" val="7" />
591.                         <par id="KS43" val="20" />
592.                         <par id="FFS" val="0" />
593.                         <par id="roh_CH" val="s_fp('adm1da','roh_CH')"/>
594.                         <par id="roh_PR" val="s_fp('adm1da','roh_PR')"/>

```

```

595.      <par id="roh_LI" val="s_fp('adm1da','roh_LI')" />
596.      <par id="roh_MI" val="s_fp('adm1da','roh_MI')" />
597.      <par id="roh_AC" val="s_fp('adm1da','roh_AC')" />
598.      <par id="roh_H2O" val="1000" />
599.      <par id="MP_CH" val="s_fp('adm1da','MP_CH')" />
600.      <par id="MP_PR" val="s_fp('adm1da','MP_PR')" />
601.      <par id="MP_LI" val="s_fp('adm1da','MP_LI')" />
602.      <par id="MP_AC" val="s_fp('adm1da','MP_AC')" />
603.      <par id="Kw_35" val="s_fp('adm1da','Kw_35')" />
604.      <par id="M_Sva" val="s_fp('adm1da','M_Sva')" />
605.      <par id="M_Sbu" val="s_fp('adm1da','M_Sbu')" />
606.      <par id="M_Spro" val="s_fp('adm1da','M_Spro')" />
607.      <par id="M_Sac" val="s_fp('adm1da','M_Sac')" />
608.      <par id="M_Sh2" val="s_fp('adm1da','M_Sh2')" />
609.      <par id="M_XB" val="s_fp('adm1da','M_XB')" />
610.      <par id="M_Xch" val="s_fp('adm1da','M_Xch')" />
611.      <par id="M_Xpr" val="s_fp('adm1da','M_Xpr')" />
612.      <par id="M_Xli" val="s_fp('adm1da','M_Xli')" />
613.      <par id="Kava" val="s_fp('adm1da','Kava')" />
614.      <par id="Kabu" val="s_fp('adm1da','Kabu')" />
615.      <par id="Kapro" val="s_fp('adm1da','Kapro')" />
616.      <par id="Kaac" val="s_fp('adm1da','Kaac')" />
617.      <par id="Kaco2_35" val="s_fp('adm1da','Kaco2_35')" />
618.      <par id="Kain_35" val="s_fp('adm1da','Kain_35')" />
619.      <par id="N_aa" val="s_fp('adm1da','N_aa')" />
620.      </parameters>
621.      <Input id="u1" vis="True" Link="FM2M1" LinkIdx="0" />
622.    </Module>
623.  </extra>
624.  <icon rotate="False" flip="True" />
625. </block>
626. <block name="From Excel" blockType="sisiBlock" x="15" y="195" w="55"
    h="30" bgCol="#CFFFE7A" help="SIMBA#_Global_Block_FromXLSX.pdf" page="8">
627.   <extra blockID="basmlib.gen_infileExcelBlock" HlpIdx="">
628.     <Module id="From Excel" subtype="Signal" Assambly="basmlib.dll"
        Class="basmlib.gen_infileExcelBlock">
629.       <parameters>
630.         <par id="Model" val="Signal" />
631.         <par id="sigsize" val="1" />
632.         <par id="qunit" val="m^3/d" />
633.         <par id="exfname" val="Table1_Fluctuation_of_Biomass.xlsx" />
634.         <par id="tabname" val="SimbaFlu" />
635.         <par id="interpol" val="First Order (linear)" />
636.         <par id="afterlast" val="cyclic repitition" />
637.         <par id="average" val="false" />
638.         <par id="isexact" val="true" />
639.         <par id="showicon" val="true" />
640.         <par id="showlab" val="false" />
641.         <par id="Test" val="0.0" />

```

```

642.          <par id="Open.." val="0.0" />
643.          <par id="Copy file" val="0.0" />
644.          <par id="Buffer" val="1000" />
645.          <par id="labs" val="Biomasse;" />
646.          </parameters>
647.        </Module>
648.      </extra>
649.      <defShape typ="Arrow" lWidth="1.5" fcol="#FF9B8500" bgcol="#3BEFCD00"
var1="0.2" shadow="True" />
650.        <icon rotate="False" flip="True" />
651.      </block>
652.      <block name="Level1" blockType="sisiBlock" x="870" y="115" w="15" h="20"
help="simba#_air_level.pdf">
653.        <extra blockID="airlibBlocks.Air_LevelUni" Hlpldx="">
654.          <Module id="Level1" subtype="gash" Assambly="airlibBlocks.dll"
Class="airlibBlocks.Air_LevelUni">
655.            <parameters>
656.              <par id="Model" val="gash" />
657.              <par id="n_N2" val="0.779713" />
658.              <par id="n_O2" val="0.209919" />
659.              <par id="n_CO2" val="0.000381" />
660.              <par id="n_CH4" val="0" />
661.              <par id="n_H2" val="0" />
662.              <par id="n_NH3" val="0" />
663.              <par id="n_N2O" val="0" />
664.              <par id="n_SO2" val="0" />
665.              <par id="n_H2S" val="0" />
666.              <par id="RH" val="70" />
667.              <par id="calcP" val="false" />
668.              <par id="h0" val="0" />
669.              <par id="hw" val="4" />
670.              <par id="extP" val="false" />
671.              <par id="P" val="1013.25+5" />
672.              <par id="Pmin" val="1000" />
673.              <par id="Pmax" val="1500" />
674.              <par id="isSource" val="false" />
675.              <par id="animate" val="false" />
676.              <par id="T1" val="2.0/(24.0*60.0)" />
677.            </parameters>
678.            <Input id="Tair" vis="False" Link="temperature_air" />
679.            <Input id="i" vis="True" Link="Pipe1" LinkIdx="1" />
680.          </Module>
681.        </extra>
682.        <defShape typ="Rectangle" lWidth="2" fcol="#FF0020B8" var1="0.5" />
683.        <icon rotate="False" flip="True" />
684.      </block>
685.      <block name="Mix1" blockType="sisiBlock" x="1005" y="130" w="25" h="50"
drawFrame="False" help="SIMBA#_Global_Block_Mlx.pdf" page="28">
686.        <extra blockID="basmlib.asm_mixBlock" Hlpldx="">

```



```

687.          <Module id="Mix1" subtype="gash" Assambly="basmlib.dll"
          Class="basmlib.asm_mixBlock">
688.          <parameters>
689.          <par id="Model" val="gash" />
690.          <par id="type" val="classic" />
691.          <par id="nin" val="2" />
692.          </parameters>
693.          <Input id="u0" vis="True" Link="Level1" LinkIdx="0" />
694.          <Input id="u1" vis="True" Link="Level" LinkIdx="0" />
695.          </Module>
696.        </extra>
697.        <icon rotate="False" flip="True" />
698.      </block>
699.      <block name="plant1" blockType="sisiblock" x="20" y="380" w="30" h="30"
        bgCol="#F2EFEFEF" help="SIMBA#_Global_Block_Temperature_Zero.pdf" page="32">
700.        <extra blockID="basmlib.asm_constBlock" Hlpldx="">
701.          <Module id="plant1" subtype="Signal,1" Assambly="basmlib.dll"
          Class="basmlib.asm_constBlock">
702.          <parameters>
703.          <par id="Model" val="Signal" />
704.          <par id="Dimmension" val="1" />
705.          <par id="Constant_0" val="1" />
706.          <par id="unit_0" val="-" />
707.          <par id="sel_0" val="User defined" />
708.          <par id="displayUnits" val="false" />
709.          </parameters>
710.          </Module>
711.        </extra>
712.        <defShape typ="Rectangle" fcol="#FF606060" bgcol="#26606060"
        shadow="True" />
713.        <icon rotate="False" flip="True" />
714.      </block>
715.      <block name="Sludge_overflow1" blockType="sisiblock" x="945" y="235"
        w="20" h="10" help="SIMBA#_Global_Block_Sink.pdf" page="30">
716.        <extra blockID="basmlib.asm_sinkBlock" Hlpldx="">
717.          <Anno>DQo=</Anno>
718.          <Module id="Sludge_overflow1" subtype="adm1da"
          Assambly="basmlib.dll" Class="basmlib.asm_sinkBlock">
719.          <parameters>
720.          <par id="Model" val="adm1da" />
721.          <par id="size" val="43" />
722.          <par id="sinktype" val="Sludge" />
723.          <par id="display" val="true" />
724.          <par id="feedThrough" val="false" />
725.          </parameters>
726.          <Input id="u" vis="True" Link="main fermenter" LinkIdx="0" />
727.        </Module>
728.      </extra>

```

```

729.      <defShape typ="Arrow" lWidth="1.5" fcol="#FF0049C3" bgcol="#180049C3"
      var1="0.2" shadow="True" />
730.      <icon rotate="True" flip="False" />
731.      </block>
732.      <block name="Separator RF " blockType="sisiblock" x="880" y="300" w="45"
      h="30" drawFrame="False" help="simba#_biogas_separator_rf_en.pdf">
733.      <extra blockID="badmLib.adm_sep_as1" Hlpldx="">
734.      <Module id="Separator RF " subtype="adm1da" Assambly="badmLib.dll"
      Class="badmLib.adm_sep_as1">
735.      <parameters>
736.      <par id="SeparatorMA" val="Model approach" />
737.      <par id="SludgeModel" val="adm1da" />
738.      <par id="ControlPortPosition" val="Top" />
739.      <par id="SeparatorDP" val="Device parameter" />
740.      <par id="ControlTypeList" val="Flow of thick separate" />
741.      <par id="TSIndicationList" val="Specify TSS" />
742.      <par id="FinalTSContent" val="230" />
743.      <par id="FinalOTContent" val="150" />
744.      </parameters>
745.      <Input id="us1" vis="True" Link="main fermenter" LinkIdx="1" />
746.      <Input id="uc1" vis="True" Link="VolStromDick" LinkIdx="0" />
747.      </Module>
748.      </extra>
749.      <icon rotate="True" flip="False" />
750.      </block>
751.      <block name="Dickseparat" blockType="sisiblock" x="1075" y="380" w="20"
      h="10" help="SIMBA#_Global_Block_Sink.pdf" page="30">
752.      <extra blockID="basmlib.asm_sinkBlock" Hlpldx="">
753.      <Anno>DQo=</Anno>
754.      <Module id="Dickseparat" subtype="adm1da" Assambly="basmlib.dll"
      Class="basmlib.asm_sinkBlock">
755.      <parameters>
756.      <par id="Model" val="adm1da" />
757.      <par id="size" val="43" />
758.      <par id="sinktype" val="Sludge" />
759.      <par id="display" val="true" />
760.      <par id="feedThrough" val="false" />
761.      </parameters>
762.      <Input id="u" vis="True" Link="Separator RF " LinkIdx="1" />
763.      </Module>
764.      </extra>
765.      <defShape typ="Arrow" lWidth="1.5" fcol="#FF0049C3" bgcol="#180049C3"
      var1="0.2" shadow="True" />
766.      <icon rotate="True" flip="False" />
767.      </block>
768.      <block name="VolStromDick" blockType="sisiblock" x="850" y="260" w="30"
      h="30" bgCol="#F2EFEFEF" help="SIMBA#_Global_Block_Temperature_Zero.pdf"
      page="32">
769.      <extra blockID="basmlib.asm_constBlock" Hlpldx="">

```

```

770.          <Module id="VolStromDick" subtype="Signal,1" Assambly="basmlib.dll"
Class="basmlib.asm_constBlock">
771.          <parameters>
772.          <par id="Model" val="Signal" />
773.          <par id="Dimmension" val="1" />
774.          <par id="Constant_0" val="15" />
775.          <par id="unit_0" val="-" />
776.          <par id="sel_0" val="User defined" />
777.          <par id="displayUnits" val="false" />
778.          </parameters>
779.          </Module>
780.          </extra>
781.          <defShape typ="Rectangle" fcol="#FF606060" bgcol="#26606060"
shadow="True" />
782.          <icon rotate="False" flip="True" />
783.          </block>
784.          <block name="Rezi" blockType="sisiBlock" x="530" y="305" w="30" h="30"
bgCol="#F2EFEFEF" help="SIMBA#_Global_Block_Temperature_Zero.pdf" page="32">
785.          <extra blockID="basmlib.asm_constBlock" Hlpldx="">
786.          <Module id="Rezi" subtype="Signal,1" Assambly="basmlib.dll"
Class="basmlib.asm_constBlock">
787.          <parameters>
788.          <par id="Model" val="Signal" />
789.          <par id="Dimmension" val="1" />
790.          <par id="Constant_0" val="35" />
791.          <par id="unit_0" val="-" />
792.          <par id="sel_0" val="User defined" />
793.          <par id="displayUnits" val="false" />
794.          </parameters>
795.          </Module>
796.          </extra>
797.          <defShape typ="Rectangle" fcol="#FF606060" bgcol="#26606060"
shadow="True" />
798.          <icon rotate="False" flip="True" />

```
