# Supplementary material for: Integrated Cycles for Urban Biomass as a Strategy to Promote a CO2-Neutral Society—A Feasibility Study
Source: MDPI journal article supplement (doi:10.3390/su13179505), 2021-08-24
Supplement: s1 [file s1]

Supplementary Table XX. Parameter values and their units as used in the two crop simulation model scenario in the greenhouse and plant factory set-up

| Description                                         | Parameter      | Unit                                | Value | Scenario |
|-----------------------------------------------------|----------------|-------------------------------------|-------|----------|
| <b>Crop</b>                                         |                |                                     |       |          |
| Fraction dry matter harvested product               | $\Theta_d$     | -                                   | 0.048 | 3,4      |
| Target harvest fresh weight                         | $FW_t$         | g plant <sup>-1</sup>               | 100   | 3,4      |
| plant density                                       | $\rho_p$       | -                                   | 36    | 3,4      |
| Maximum leaf area index                             | $LAI_{max}$    | -                                   | 1.6   | 3,4      |
| Superficial chlorophyll density                     | $\rho_{chl}$   | -                                   | 0.45  | 3,4      |
| Fraction PAR absorbed by non-photosynthetic parts   | $\Theta_{PAR}$ | -                                   | 0.1   | 3,4      |
| <b>Climate</b>                                      |                |                                     |       |          |
| Setpoint minimum daily light integral greenhouse    | $DLI_{set,GH}$ | mol m <sup>-2</sup> d <sup>-1</sup> | 12    | 3        |
| Setpoint minimum daily light integral plant factory | $DLI_{set,VF}$ | mol m <sup>-2</sup> d <sup>-1</sup> | 20    | 4        |
| Setpoint temperature heating day                    | $T_{h,d}$      | °C                                  | 18    | 3,4      |
| Setpoint temperature heating night                  | $T_{h,n}$      | °C                                  | 16    | 3,4      |
| Setpoint temperature ventilation day                | $T_{v,d}$      | °C                                  | 22    | 3        |
| Setpoint temperature ventilation night              | $T_{v,n}$      | °C                                  | 22    | 3        |
| Setpoint temperature cooling                        | $T_c$          | °C                                  | 18.5  | 4        |
| Setpoint maximum humidity                           | $RH_s$         | %                                   | 82.5  | 3,4      |
| Setpoint daytime minimum CO <sub>2</sub>            | $C_s$          | μmol mol <sup>-1</sup>              | 700   | 3,4      |

| Cultivation                                    |                      |                     |     |     |
|------------------------------------------------|----------------------|---------------------|-----|-----|
| LED light energy conversion                    | $I$                  | $\text{mol J}^{-1}$ | 2.4 | 3,4 |
| Fraction diffuse light transmission greenhouse | $\Theta_{I,Tr}$      | -                   | 0.8 | 3   |
| Net crop production area greenhouse            | $A_{\text{crop,GH}}$ | $\text{m}^2$        | 70  | 3   |
| Net crop production area plant factory         | $A_{\text{crop,VF}}$ | $\text{m}^2$        | 70  | 4   |
| Heights vertical production layer              | $h_{VF}$             | m                   | 0.5 | 4   |
| Number vertical production layers              | $N_{VF}$             | -                   | 4   | 4   |
| Total volume production unit greenhouse        | $V_{GH}$             | $\text{m}^3$        | 280 | 3   |
| Total volume production unit plant factory     | $V_{VF}$             | $\text{m}^3$        | 60  | 4   |
